# Supplementary material
Source: Elsevier journal article supplement (https://www.sciencedirect.com/science/article/pii/S0365669120302070)
Supplement: mmc1 [file S0365669120302070:mmc1.pdf]

## Encuesta: Examen Oftalmológico Durante el Control del Niño Sano

1. ¿Cuánto Tiempo que lleva realizando el Control del niño Sano?

- ☐ Menos de 1 año
- ☐ 1 a 5 años
- ☐ 5 a 10 años
- ☐ Más de 10 años

2. ¿Sabe Ud. en que consiste el examen del Rojo Pupilar?

- ☐ Sí
- ☐ No
- ☐ Parcialmente

3. ¿Realiza Ud. el examen de Rojo Pupilar en los Controles del Niño Sano?

- ☐ Siempre (a todos los niños preverbales en todos los controles)
- ☐ A veces (a algunos niños preverbales o sólo en algunos controles)
- ☐ Nunca

4. Si respondió NUNCA: ¿Cuál es la razón para NO realizar el examen de Rojo Pupilar?

- ☐ El rojo pupilar no forma parte del control del niño sano
- ☐ No sé como realizar o interpretar el rojo pupilar
- ☐ No tengo tiempo para realizar el examen
- ☐ No tengo un oftalmoscopio en mi lugar de trabajo

5. ¿Le gustaría asistir a una jornada/taller de capacitación sobre el examen del rojo pupilar en la consulta pediátrica?

- ☐ Sí
- ☐ No
- ☐ Tal vez

6. ¿Usaría una aplicación gratuita para el teléfono celular que le permita hacer examen de rojo pupilar ?

- ☐ Sí la usaría, en vez del oftalmoscopio
- ☐ Sí la usaría, como complemento del oftalmoscopio
- ☐ No la usaría, prefiero el oftalmoscopio
- ☐ No usaría el teléfono celular ni el oftalmoscopio

7. En niños verbales y cooperadores: ¿Les chequea la visión (agudeza visual) con algún tipo de cartilla durante el control del niño sano?

- ☐ Siempre lo hago
- ☐ A veces lo hago
- ☐ Nunca lo hago

8. Si respondió NUNCA: ¿Cuál es la razón para NO tomar la visión durante el control del niño sano?

- ☐ La visión no forma parte del control del niño sano
- ☐ No tengo tiempo para hacerlo
- ☐ No tengo cartillas adecuadas para tomar la visión en mi lugar de trabajo
- ☐ No sé como tomar la visión adecuadamente a los niños

9. Por favor indique su Profesión

- ☐ Médico Pediatra (especialista)
- ☐ Médico general y/o medicina Familiar
- ☐ Enfermera Universitaria
- ☐ Técnico Paramédico/Auxiliar de Enfermería
- ☐ Otro (Nutricionista, Matrona, etc.)

10. Por Favor: Indique su edad y Género

Edad (años)

Género:

(Masculino/Femenino)
